# Supplementary material
Source: MDPI journal article supplement (https://www.mdpi.com/2227-9040/11/8/452)
Supplement: s1 [file s1 › chemosensors-2515656-supplementary.pdf]

# Facile Fabrication of a Selective Poly(caffeic acid)@MWCNT-Ni(OH)<sub>2</sub> Hybrid Nanomaterial and Its Application as a Non-Enzymatic Glucose Sensor

Maria Kuznowicz <sup>1</sup>, Tomasz Rębiś <sup>2</sup>, Artur Jędrzak <sup>1,3</sup>, Grzegorz Nowaczyk <sup>3</sup> and Teofil Jesionowski <sup>1,\*</sup>

<sup>1</sup> Institute of Chemical Technology and Engineering, Faculty of Chemical Technology, Poznan University of Technology, Berdychowo 4, PL-60965 Poznan, Poland

<sup>2</sup> Institute of Chemistry and Technical Electrochemistry, Faculty of Chemical Technology, Poznan University of Technology, Berdychowo 4, PL-60965 Poznan, Poland; tomasz.rebis@put.poznan.pl

<sup>3</sup> NanoBioMedical Centre, Adam Mickiewicz University, Wszechnicy Piastowskiej 3, PL-61614 Poznan, Poland

\* Correspondence: teofil.jesionowski@put.poznan.pl

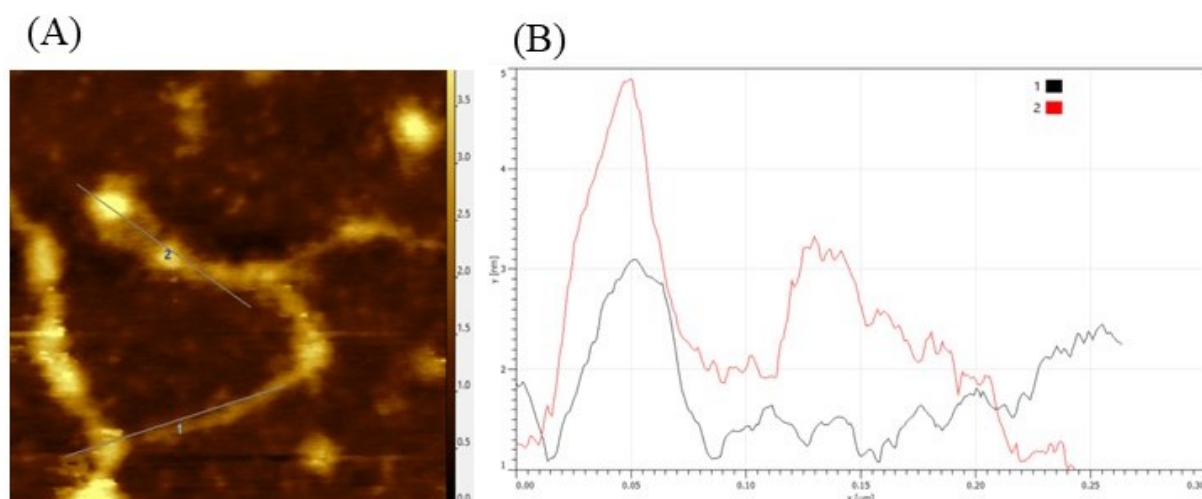

**Figure S1.** (A) 2D AFM image and (B) surface profile analysis of PCA@MWCNT-Ni(OH)<sub>2</sub>.

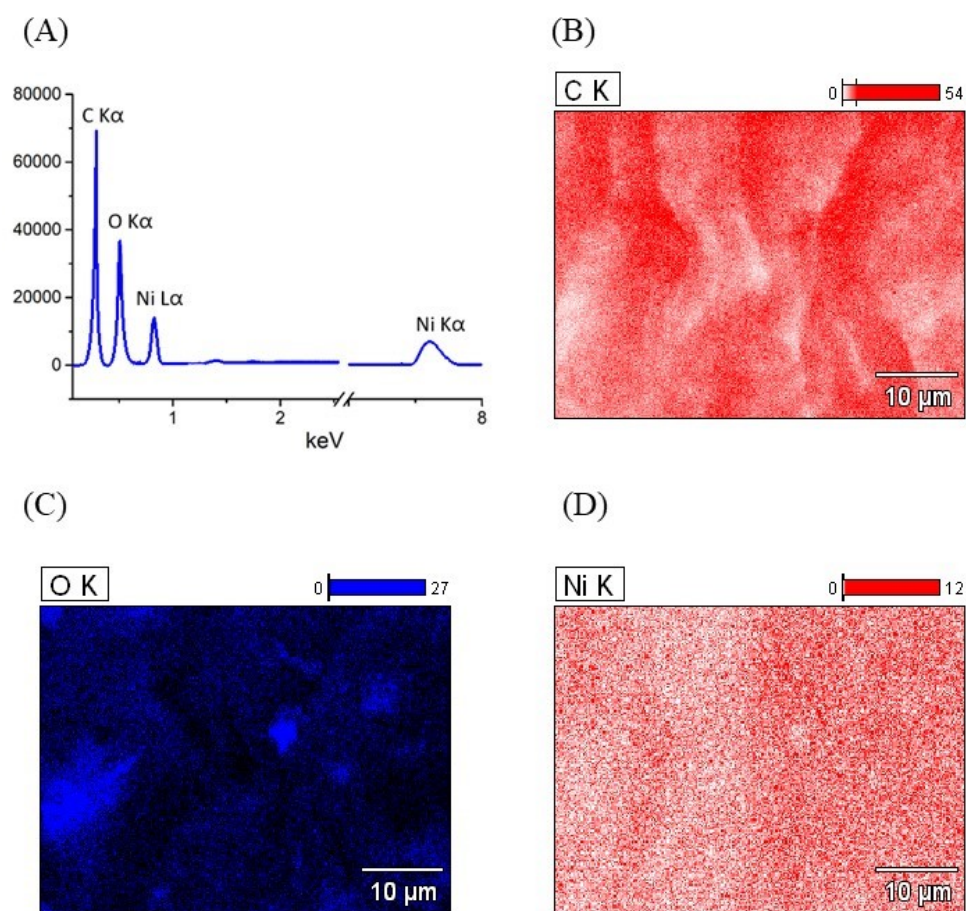

**Figure S2.** EDS mapping spectrum of PCA@MWCNT-Ni(OH)<sub>2</sub> (A) and SEM micrographs of elemental carbon (B), oxygen (C), and nickel (D).

**Table S1.** EDS analysis results for PCA@MWCNT-Ni(OH)<sub>2</sub> material.

| Element | Content of element by weight (%) |
|---------|----------------------------------|
| C       | 69.76                            |
| O       | 26.46                            |
| Ni      | 3.78                             |

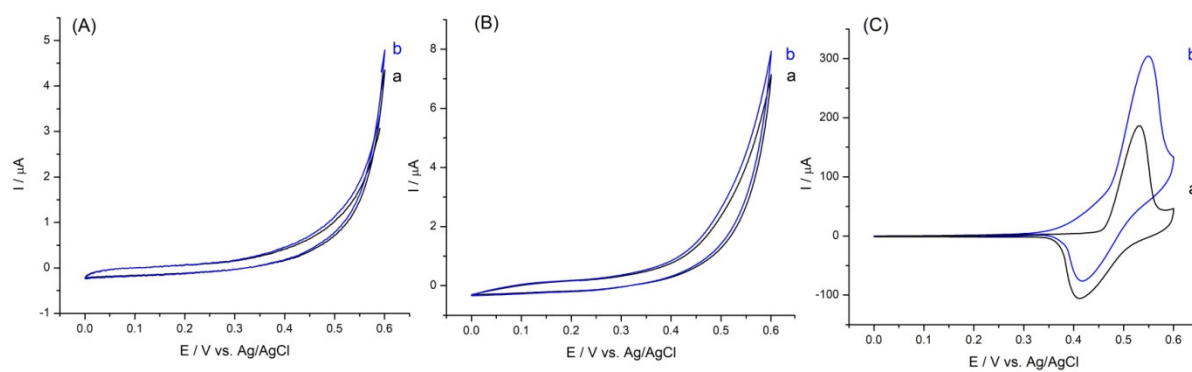

**Figure S3.** CVs of 0.1 M NaOH solution at GC/MWCNT (A), GC/PCA@MWCNT (B), GC/PCA@MWCNT-Ni(OH)<sub>2</sub> (C) in the absence (a) and presence (b) of 1 mM glucose at 10 mV s<sup>-1</sup>.

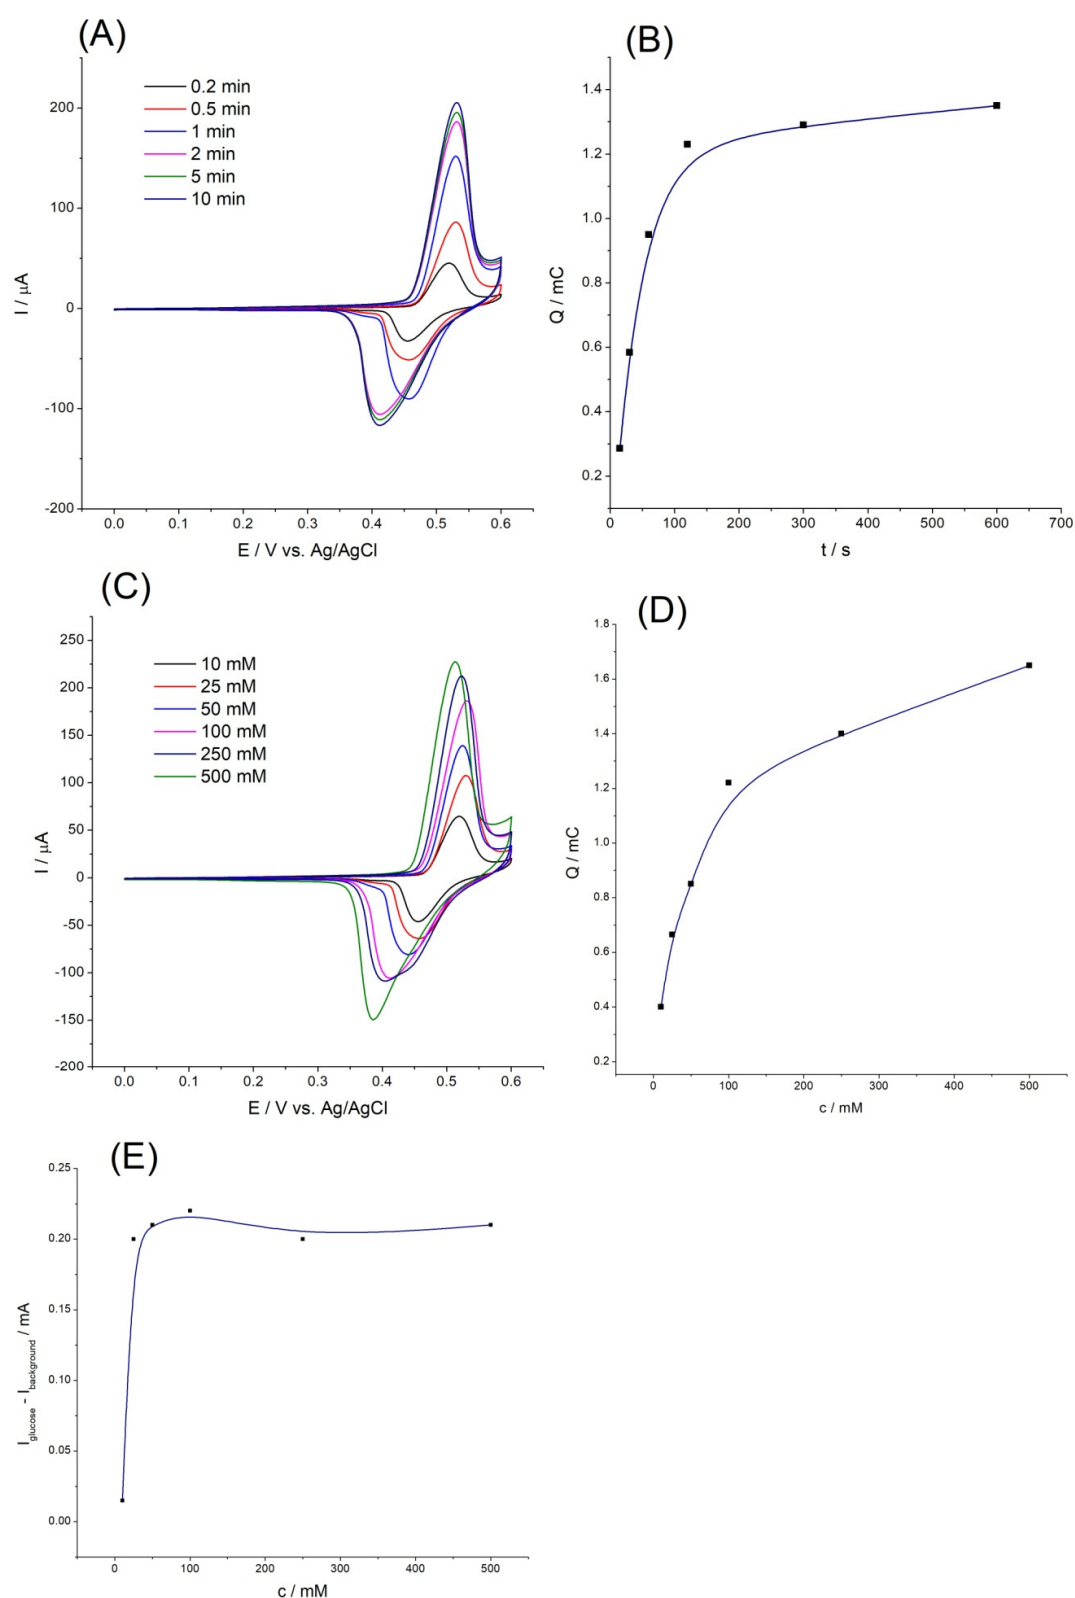

**Figure S4.** Change in GC/PCA@MWCNT- $\text{Ni}(\text{OH})_2$  redox response depending on the complexation time of  $\text{NiSO}_4$  used in the fabrication of GC/PCA@MWCNT- $\text{Ni}(\text{OH})_2$  (concentration of  $\text{NiSO}_4$  was 50 mM) (A). Relationship between anodic peak charge and time of accumulation (B). Change in GC/PCA@MWCNT- $\text{Ni}(\text{OH})_2$  redox response depending on the concentration of  $\text{NiSO}_4$  used in the fabrication of GC/PCA@MWCNT- $\text{Ni}(\text{OH})_2$  (time of accumulation was 2 min) (C). Relationship

between anodic peak charge and  $\text{NiSO}_4$  concentration (D). Value of  $I_{\text{glucose}} - I_{\text{background}}$  recorded at GC/PCA@MWCNT- $\text{Ni}(\text{OH})_2$  prepared using various  $\text{NiSO}_4$  concentrations (E).

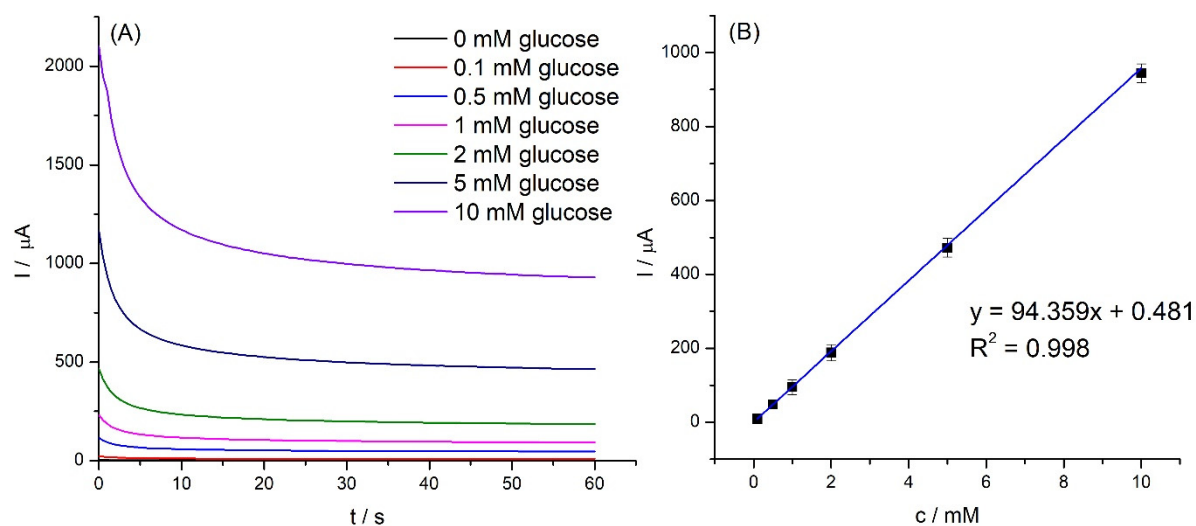

**Figure S5.** Chronoamperometric responses of GC/PCA@MWCNT- $\text{Ni}(\text{OH})_2$  for various glucose concentrations (100  $\mu\text{M}$  – 10 mM) in 0.1 M NaOH at +0.5 V (A); the corresponding calibration curve of current response vs. glucose concentration (B) ( $n = 3$ ).

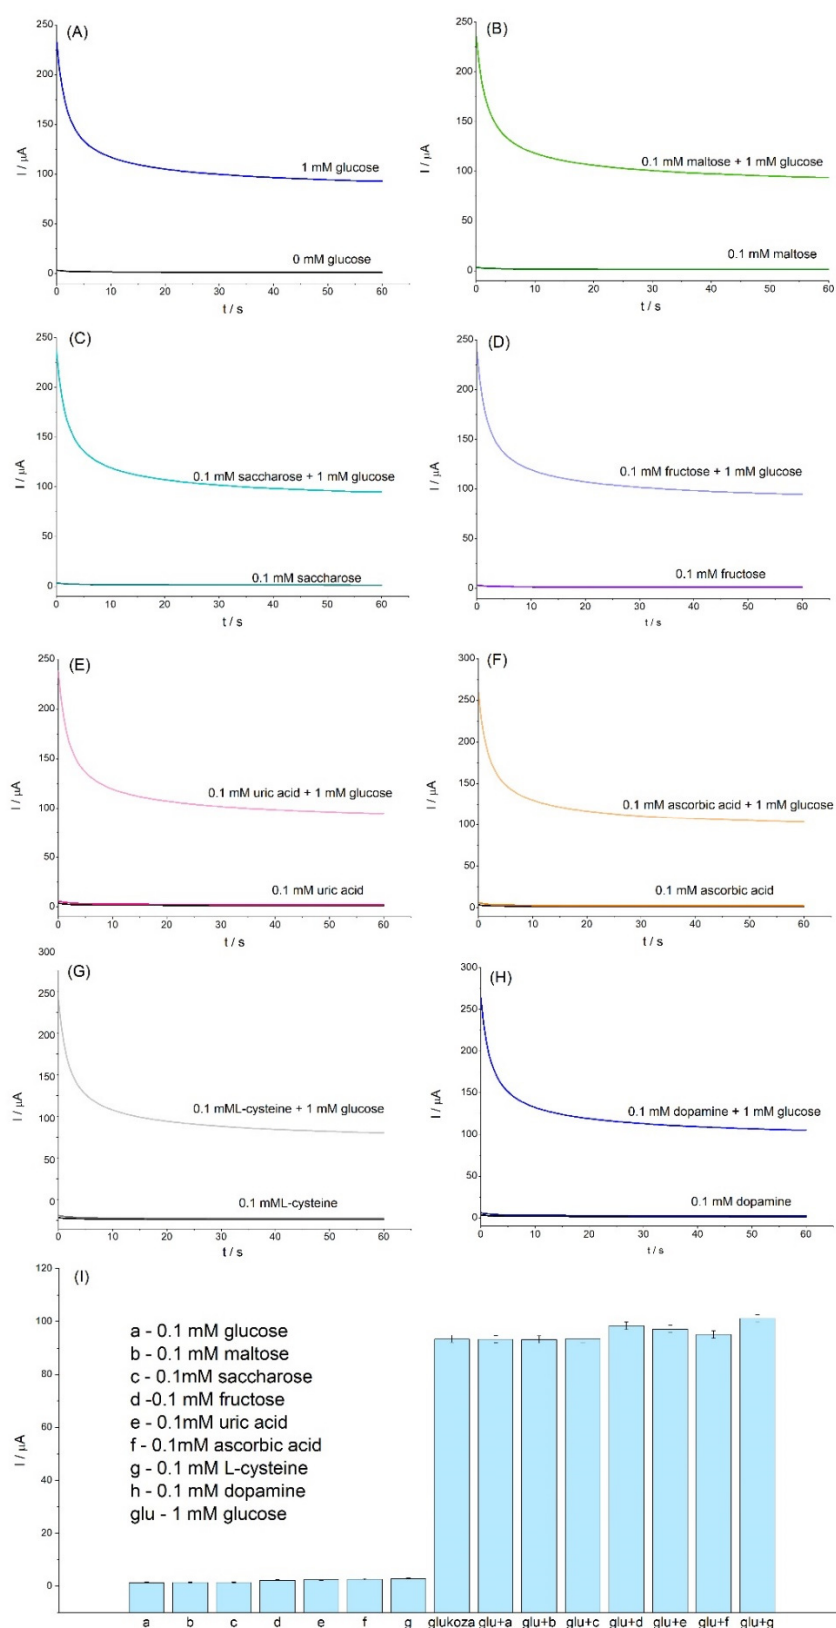

**Figure S6.** GC/PCA@MWCNT-Ni(OH)<sub>2</sub> sensor's amperometric response to 1 mM glucose (A) and individual interferents (0.1 mM): maltose (B), saccharose (C), fructose (D), uric acid (E), ascorbic acid (F), L-cysteine (G), dopamine (H), in the absence and presence of 1 mM glucose in 0.1 M NaOH solution at +0.5 V. (I) comparison of the relative response for the tested interferents against glucose.

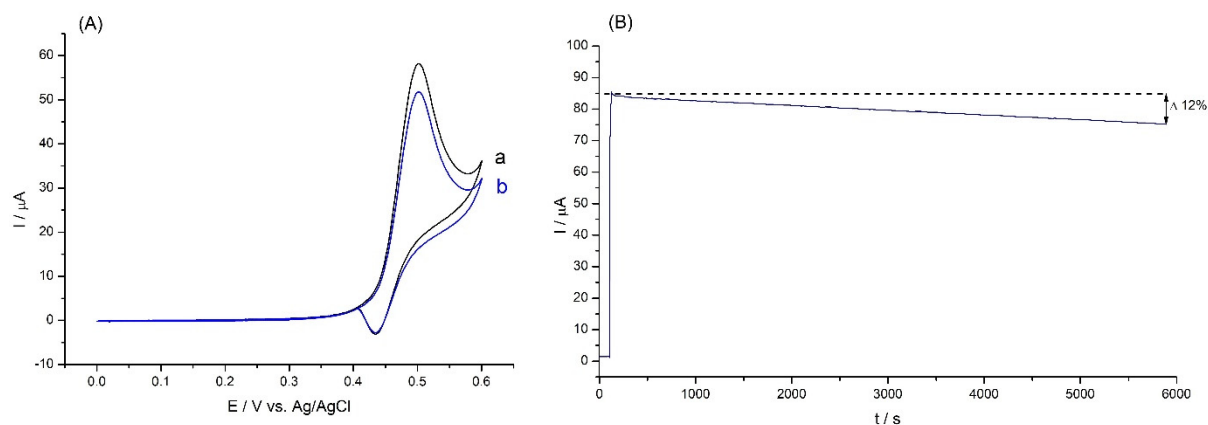

**Figure S7.** CV curves recorded in 1 mM glucose at the first measurement (a) and after 200 consecutive measurements (b) (A); chronoamperometric response of the GC/PCA@MWCNT-Ni(OH)<sub>2</sub> electrode after 6000 s at +0.5 V (B).

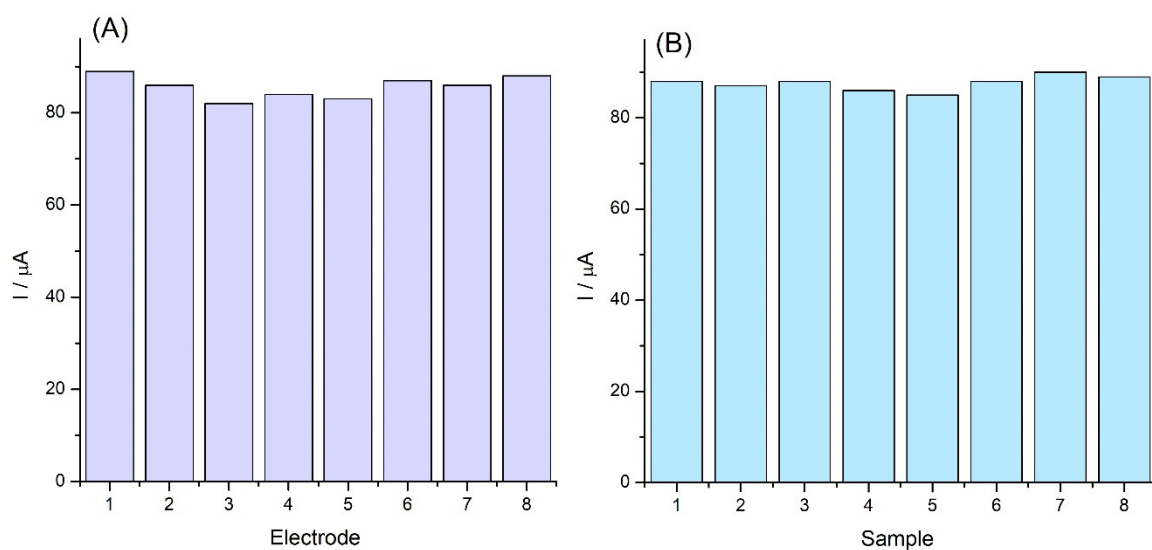

**Figure S8.** Reproducibility of eight electrodes for the detection of 1 mM glucose (A); repeatability of a single electrode for detection in eight samples containing 1 mM glucose (B).
